# Supplementary material for: Macroinvertebrate Spatial Diversity Patterns of Shore Habitats in Italian High-Altitude Natural and Permanent Lakes and Ponds
Source: MDPI journal article supplement (doi:10.3390/w15213814), 2023-10-31
Supplement: s1 [file s1]

# Macroinvertebrate Spatial Diversity Patterns of Shore Habitats in Italian High-Altitude Natural and Permanent Lakes and Ponds

## Supplementary Information

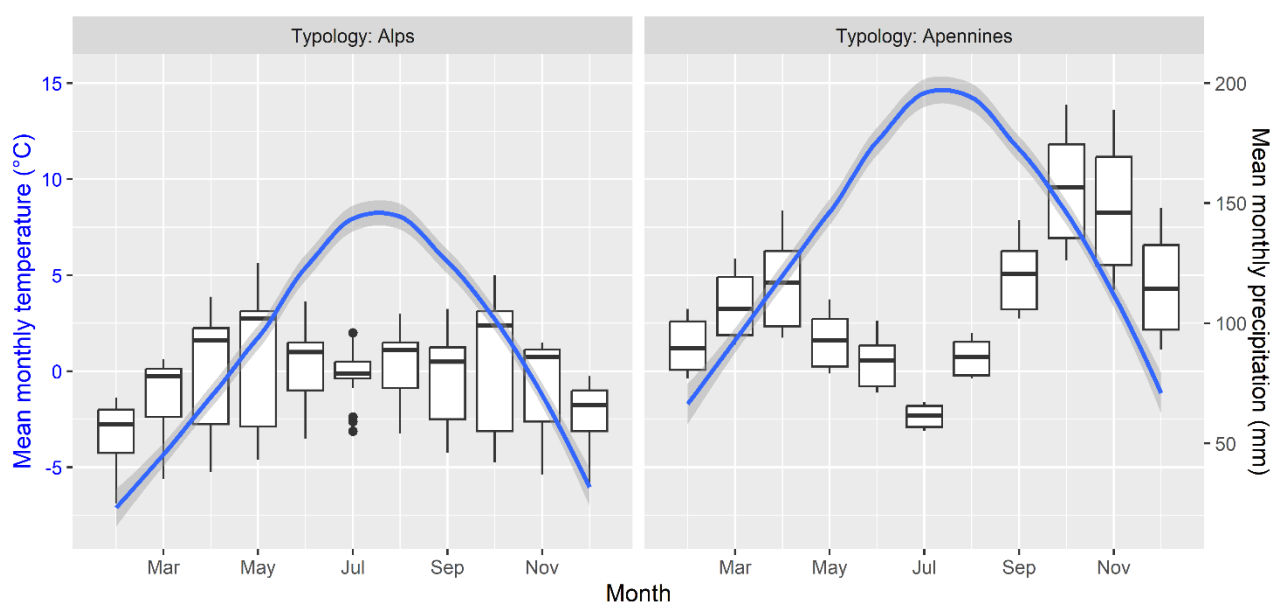

**Figure S1.** Mean monthly temperatures (blue lines) and mean monthly precipitations (boxplots) for the CW Alps (left) and for the MA (right).

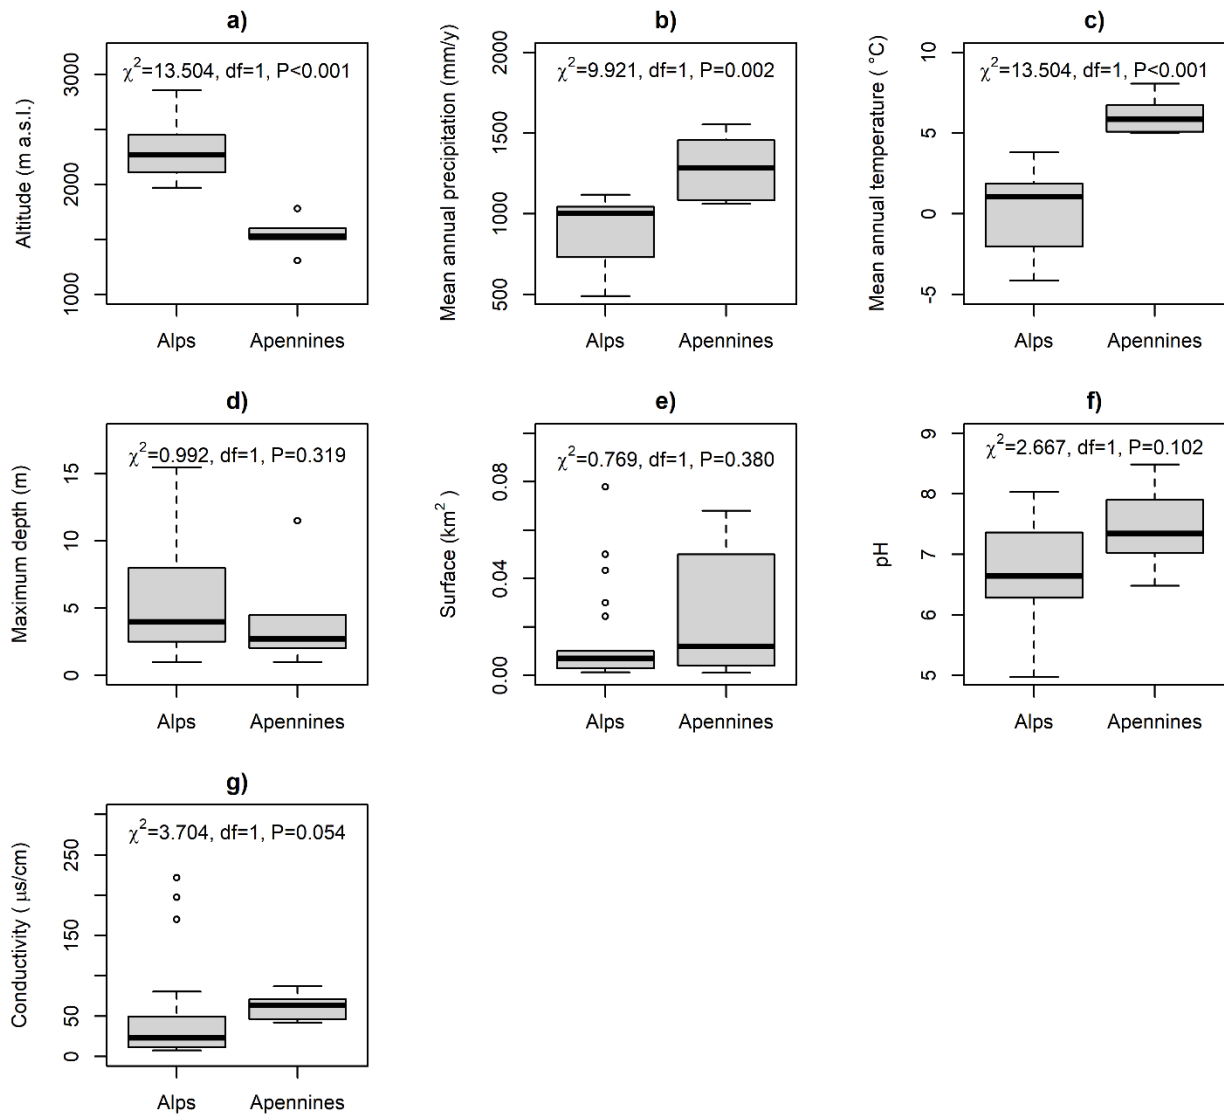

**Figure S2.** Box plots of selected geographic and morphometric characteristic for the studied Italian mountain ranges (CW Alps and MA Apennines). Statistical significance through Kruskal-Wallis test between categories are reported.

**Table S1.** List of lakes studied distributed on the two Italian mountain chains. Columns represents Region where the lakes are, River basin, lake name, main geology, year of sampling, Latitude and Longitude (WGS 84), Altitude (m a.s.l.), maximum depth (m), lake area (km<sup>2</sup>), water temperature (°C), conductivity (μS cm<sup>-1</sup>), and pH.

|    | Mountain range | Region         | Basin         | Lake name     | Geology            | Sampling year | Latitude N  | Longitude E | Altitude | Depth max | Area  | Temp | Cond | pH   |
|----|----------------|----------------|---------------|---------------|--------------------|---------------|-------------|-------------|----------|-----------|-------|------|------|------|
| 1  | Alps           | Lombardy       | Adda          | Bianco        | micaschists/gneiss | 2011          | 45.34467500 | 10.49230833 | 2608     | 8         | 0.043 | 4.0  | 73   | 7.57 |
| 2  | Alps           | Piedmont       | Toce          | Campo IV      | orthogneiss        | 2000          | 46.12944444 | 8.130555556 | 2279     | 7         | 0.007 | 5.2  | 49   | 7.47 |
| 3  | Alps           | Piedmont       | Toce          | Capezzone     | kinzigites         | 2000          | 45.94055556 | 8.210000000 | 2100     | 6         | 0.009 | 8.5  | 23   | 6.77 |
| 4  | Alps           | Piedmont       | Maggia        | Geccio        | paragneiss         | 2000          | 46.09585556 | 8.417688889 | 2109     | 2         | 0.010 | 8.5  | 19   | 6.62 |
| 5  | Alps           | Piedmont       | Toce          | Grande        | gneiss             | 2000          | 46.00277778 | 8.078333333 | 2269     | 5         | 0.007 | 6.4  | 7    | 5.76 |
| 6  | Alps           | Lombardy       | Adda          | L1 Pisella    | micaschists/gneiss | 2011          | 46.43935833 | 10.53855278 | 2857     | 3         | 0.003 | 9.3  | 222  | 8.00 |
| 7  | Alps           | Lombardy       | Adda          | L1 Rosole     | micaschists/gneiss | 2011          | 46.42538889 | 10.59011667 | 2834     | 3         | 0.001 | 11.0 | 197  | 6.84 |
| 8  | Alps           | Lombardy       | Adda          | L2 Pisella    | micaschists/gneiss | 2011          | 46.44128333 | 10.54330556 | 2842     | 3         | 0.002 | 8.0  | 27   | 7.36 |
| 9  | Alps           | Lombardy       | Adda          | Manzina       | micaschists/gneiss | 2011          | 46.43737500 | 10.53218333 | 2785     | 3         | 0.024 | 5.5  | 170  | 7.78 |
| 10 | Alps           | Piedmont       | Maggia        | Marmo         | amphibolites       | 2000          | 46.06333333 | 8.480083330 | 1988     | 2         | 0.002 | 10.0 | 30   | 6.60 |
| 11 | Alps           | Piedmont       | Toce          | Matogno       | orthogneiss        | 2000          | 46.25083333 | 8.401388889 | 2087     | 14        | 0.030 | 11.7 | 80   | 8.03 |
| 12 | Alps           | Lombardy       | Oglio         | Nero          | micaschists/gneiss | 2011          | 46.33587222 | 10.48132222 | 2386     | 13        | 0.078 | 10.5 | 29   | 7.19 |
| 13 | Alps           | Piedmont       | Toce          | Paione_inf    | orthogneiss        | 2000          | 46.16888889 | 8.190833333 | 2002     | 14        | 0.007 | 16.0 | 13   | 6.64 |
| 14 | Alps           | Piedmont       | Toce          | Paione_med    | orthogneiss        | 2000          | 46.17222222 | 8.191944444 | 2147     | 5         | 0.007 | 13.0 | 13   | 6.53 |
| 15 | Alps           | Piedmont       | Toce          | Paione_sup    | orthogneiss        | 2000          | 46.17583333 | 8.190833333 | 2269     | 12        | 0.009 | 13.3 | 9    | 6.06 |
| 16 | Alps           | Piedmont       | Toce          | Pojala        | marbles/schists    | 2000          | 46.32944444 | 8.334722222 | 2305     | 16        | 0.050 | 7.9  | 33   | 7.17 |
| 17 | Alps           | Piedmont       | S. Bernardino | Pozza_Scaredi | amphibolites       | 2000          | 46.06126670 | 8.473600000 | 1970     | 1         | 0.002 | 11.1 | 13   | 4.97 |
| 18 | Alps           | Lombardy       | Adda          | Rosole        | gneiss             | 2011          | 46.41313889 | 10.58502222 | 2452     | 3         | 0.003 | 16.5 | 11   | 6.38 |
| 19 | Alps           | Piedmont       | Toce          | Sfondato      | gneiss             | 2000          | 46.00694444 | 8.087777778 | 2422     | 2         | 0.005 | 4.2  | 9    | 5.58 |
| 20 | Alps           | Piedmont       | Toce          | Variola_inf   | ortogneiss         | 2000          | 46.17638889 | 8.215277778 | 2117     | 2         | 0.003 | 10.0 | 10   | 6.19 |
| 21 | Alps           | Piedmont       | Toce          | Variola_sup   | ortogneiss         | 2000          | 46.18000000 | 8.211666667 | 2190     | 4         | 0.009 | 9.1  | 10   | 6.28 |
| 22 | Apennines      | Emilia-Romagna | Panaro        | Baccio        | quartz             | 2006          | 44.12972222 | 10.58861111 | 1554     | 3         | 0.014 | 19.8 | 42   | 6.48 |
| 23 | Apennines      | Emilia-Romagna | Panaro        | Ninfa         | quartz             | 2011          | 44.21083333 | 10.72500000 | 1503     | 2         | 0.004 | 16.9 | 87   | 7.90 |
| 24 | Apennines      | Emilia-Romagna | Panaro        | Pratignano    | quartz             | 2006          | 44.17361111 | 10.81833333 | 1307     | 5         | 0.050 | 16.0 | 71   | 7.02 |
| 25 | Apennines      | Emilia-Romagna | Panaro        | Santo         | quartz             | 2001          | 44.13694444 | 10.58472222 | 1501     | 12        | 0.068 | 17.4 | 57   | 7.23 |
| 26 | Apennines      | Emilia-Romagna | Panaro        | Scaffaiolo    | quartz             | 2008          | 44.11861111 | 10.80777778 | 1780     | 2         | 0.010 | 17.9 | 46   | 8.49 |
| 27 | Apennines      | Emilia-Romagna | Panaro        | Turchino      | quartz             | 2010          | 44.12027778 | 10.59916667 | 1600     | 1         | 0.001 | 12.5 | 70   | 7.46 |

**Table S2.** Presence/absence matrix of lakes macroinvertebrates in the two Italian mountain chains (from Bianco Gavia to Variola Sup are lakes of Alps Region; from Baccio to Turchino are lakes of Apennines Region). Columns represents lake name, and presence (1) or absence (0) for all the targeted taxa.

|                                       | Bianco_Gavia | Campo_IV | Capezzone | Geccio | Grande | Val_Pisella_L1 | Val_Rosole_L1 | Val_Pisella_L2 | Manzina | Marmo | Matogno | Nero_Valle_Messi | Paione_Inf | Paione_Med | Paione_Sup | Pojala | Pozza_Scaredi | Rosole | Sfondato | Variola_Inf | Variola_Sup | Baccio | Ninfa | Pratignano | Santo | Scaffaiolo | Turchino |
|---------------------------------------|--------------|----------|-----------|--------|--------|----------------|---------------|----------------|---------|-------|---------|------------------|------------|------------|------------|--------|---------------|--------|----------|-------------|-------------|--------|-------|------------|-------|------------|----------|
| <i>Agrypnia varia</i>                 | 0            | 0        | 0         | 0      | 0      | 0              | 0             | 0              | 0       | 0     | 0       | 0                | 0          | 0          | 0          | 0      | 0             | 0      | 0        | 0           | 0           | 1      | 0     | 0          | 0     | 0          | 0        |
| <i>Lispe</i>                          | 0            | 0        | 0         | 0      | 0      | 0              | 0             | 0              | 0       | 0     | 0       | 0                | 0          | 0          | 0          | 0      | 0             | 0      | 0        | 0           | 0           | 1      | 0     | 0          | 0     | 0          | 0        |
| <i>Paratendipes</i>                   | 0            | 0        | 0         | 0      | 0      | 0              | 0             | 0              | 0       | 0     | 0       | 0                | 0          | 0          | 0          | 0      | 0             | 0      | 0        | 0           | 0           | 0      | 0     | 0          | 1     | 0          | 0        |
| <i>Microtendipes</i>                  | 0            | 0        | 0         | 0      | 0      | 0              | 0             | 0              | 0       | 0     | 0       | 0                | 0          | 0          | 0          | 0      | 0             | 0      | 0        | 0           | 0           | 0      | 0     | 0          | 1     | 0          | 0        |
| <i>Hydaticus</i>                      | 0            | 0        | 0         | 0      | 0      | 0              | 0             | 0              | 0       | 0     | 0       | 0                | 0          | 0          | 0          | 0      | 0             | 0      | 0        | 0           | 0           | 1      | 0     | 0          | 0     | 0          | 0        |
| <i>Micronecta scholtzi</i>            | 0            | 0        | 0         | 0      | 0      | 0              | 0             | 0              | 0       | 0     | 0       | 0                | 0          | 0          | 0          | 0      | 0             | 0      | 0        | 0           | 0           | 1      | 0     | 0          | 0     | 0          | 0        |
| <i>Habrophlebia fusca</i>             | 0            | 0        | 0         | 0      | 0      | 0              | 0             | 0              | 0       | 0     | 0       | 0                | 0          | 0          | 0          | 0      | 0             | 0      | 0        | 0           | 0           | 0      | 0     | 0          | 1     | 0          | 0        |
| <i>Siphonurus lacustris</i>           | 0            | 0        | 0         | 0      | 0      | 0              | 0             | 0              | 0       | 0     | 0       | 0                | 0          | 0          | 0          | 0      | 0             | 0      | 0        | 0           | 0           | 0      | 0     | 0          | 1     | 0          | 0        |
| <i>Baetis niger</i>                   | 0            | 0        | 0         | 0      | 0      | 0              | 0             | 0              | 0       | 0     | 0       | 0                | 0          | 0          | 0          | 0      | 0             | 0      | 0        | 0           | 0           | 0      | 0     | 0          | 1     | 0          | 0        |
| <i>Baetis digitatus</i>               | 0            | 0        | 0         | 0      | 0      | 0              | 0             | 0              | 0       | 0     | 0       | 0                | 0          | 0          | 0          | 0      | 0             | 0      | 0        | 0           | 0           | 1      | 0     | 0          | 0     | 0          | 0        |
| <i>Gammarus</i>                       | 0            | 0        | 0         | 0      | 0      | 0              | 0             | 0              | 0       | 0     | 0       | 0                | 0          | 0          | 0          | 0      | 0             | 0      | 0        | 0           | 0           | 0      | 0     | 0          | 1     | 0          | 0        |
| <i>Chirocephalus diaphanus</i>        | 0            | 0        | 0         | 0      | 0      | 0              | 0             | 0              | 0       | 0     | 0       | 0                | 0          | 0          | 0          | 0      | 0             | 0      | 0        | 0           | 0           | 0      | 0     | 0          | 0     | 1          | 0        |
| <i>Procladius</i>                     | 0            | 0        | 1         | 0      | 0      | 0              | 0             | 0              | 0       | 1     | 0       | 0                | 0          | 0          | 1          | 0      | 1             | 0      | 0        | 1           | 1           | 1      | 0     | 1          | 0     | 0          | 1        |
| <i>Macropelopia</i>                   | 0            | 1        | 1         | 0      | 0      | 0              | 0             | 0              | 0       | 1     | 1       | 0                | 1          | 0          | 1          | 0      | 0             | 0      | 0        | 0           | 0           | 1      | 1     | 0          | 0     | 0          | 1        |
| <i>Ablabesmyia longistyla</i>         | 0            | 0        | 0         | 0      | 0      | 0              | 0             | 0              | 0       | 0     | 0       | 0                | 0          | 0          | 0          | 0      | 0             | 0      | 0        | 0           | 0           | 0      | 0     | 0          | 0     | 0          | 1        |
| <i>Zavrelimyia</i>                    | 0            | 1        | 1         | 1      | 1      | 0              | 0             | 0              | 0       | 1     | 1       | 0                | 1          | 1          | 1          | 1      | 0             | 0      | 1        | 1           | 1           | 0      | 0     | 0          | 0     | 0          | 0        |
| <i>Apsectrotanypus trifascipennis</i> | 0            | 1        | 1         | 0      | 0      | 0              | 0             | 0              | 0       | 0     | 0       | 0                | 1          | 0          | 0          | 0      | 0             | 0      | 0        | 0           | 0           | 0      | 0     | 0          | 0     | 0          | 0        |
| <i>Psectrotanypus varius</i>          | 0            | 0        | 0         | 0      | 0      | 0              | 0             | 0              | 0       | 0     | 0       | 0                | 0          | 0          | 0          | 0      | 0             | 0      | 0        | 0           | 0           | 0      | 0     | 1          | 0     | 0          | 0        |
| <i>Tanypus</i>                        | 0            | 0        | 0         | 0      | 0      | 0              | 0             | 0              | 0       | 0     | 0       | 0                | 0          | 0          | 0          | 0      | 0             | 0      | 0        | 0           | 0           | 0      | 0     | 1          | 0     | 0          | 0        |
| <i>Polypedilum</i>                    | 0            | 0        | 0         | 0      | 0      | 0              | 0             | 0              | 0       | 0     | 0       | 0                | 0          | 0          | 0          | 0      | 0             | 0      | 0        | 0           | 0           | 1      | 0     | 1          | 0     | 0          | 0        |
| <i>Chironomus</i>                     | 0            | 0        | 0         | 0      | 0      | 0              | 0             | 0              | 0       | 1     | 0       | 0                | 0          | 0          | 0          | 0      | 1             | 1      | 0        | 0           | 0           | 1      | 1     | 1          | 0     | 0          | 0        |
| <i>Einfeldia pagana</i>               | 0            | 0        | 0         | 0      | 0      | 0              | 0             | 0              | 0       | 1     | 0       | 0                | 0          | 0          | 0          | 0      | 0             | 0      | 0        | 0           | 0           | 0      | 0     | 0          | 0     | 0          | 0        |
| <i>Phaenopsectra</i>                  | 0            | 0        | 0         | 0      | 0      | 0              | 0             | 0              | 0       | 0     | 0       | 0                | 0          | 0          | 0          | 0      | 0             | 0      | 0        | 0           | 0           | 0      | 0     | 0          | 0     | 0          | 1        |
| <i>Dicrotendipes</i>                  | 0            | 0        | 0         | 0      | 0      | 0              | 0             | 0              | 0       | 0     | 0       | 0                | 0          | 0          | 0          | 0      | 0             | 0      | 0        | 0           | 0           | 0      | 0     | 1          | 0     | 0          | 0        |
| <i>Endochironomus</i>                 | 0            | 0        | 0         | 0      | 0      | 0              | 0             | 0              | 0       | 1     | 0       | 0                | 0          | 0          | 0          | 0      | 0             | 0      | 0        | 1           | 1           | 0      | 0     | 1          | 0     | 0          | 0        |

|                                      |   |   |   |   |   |   |   |   |   |   |   |   |   |   |   |   |   |   |   |   |   |   |   |   |   |   |   |   |   |   |   |   |
|--------------------------------------|---|---|---|---|---|---|---|---|---|---|---|---|---|---|---|---|---|---|---|---|---|---|---|---|---|---|---|---|---|---|---|---|
| <i>Glyptotendipes</i>                | 0 | 0 | 0 | 0 | 0 | 0 | 0 | 0 | 0 | 0 | 0 | 0 | 0 | 0 | 0 | 0 | 0 | 0 | 0 | 0 | 0 | 0 | 0 | 0 | 0 | 0 | 0 | 1 | 0 | 0 | 0 |   |
| <i>Paracladopelma</i>                | 0 | 0 | 0 | 0 | 0 | 0 | 0 | 0 | 0 | 0 | 0 | 0 | 0 | 0 | 0 | 0 | 0 | 0 | 0 | 0 | 0 | 0 | 0 | 0 | 0 | 0 | 1 | 1 | 0 | 0 | 0 |   |
| <i>Cladopelma</i>                    | 0 | 0 | 0 | 0 | 0 | 0 | 0 | 0 | 0 | 0 | 0 | 0 | 0 | 0 | 0 | 0 | 0 | 0 | 0 | 0 | 0 | 0 | 0 | 0 | 0 | 1 | 0 | 1 | 1 | 0 | 0 |   |
| <i>Tanytarsus</i>                    | 1 | 1 | 1 | 1 | 0 | 1 | 0 | 0 | 0 | 1 | 1 | 0 | 0 | 0 | 0 | 0 | 0 | 0 | 0 | 0 | 0 | 0 | 0 | 0 | 0 | 1 | 1 | 1 | 1 | 1 | 0 |   |
| <i>Cladotanytarsus</i>               | 0 | 0 | 0 | 0 | 0 | 0 | 0 | 0 | 0 | 0 | 0 | 0 | 0 | 0 | 0 | 0 | 1 | 0 | 0 | 0 | 0 | 0 | 0 | 0 | 0 | 1 | 0 | 1 | 1 | 1 | 1 |   |
| <i>Paratanytarsus</i>                | 0 | 1 | 1 | 1 | 1 | 1 | 1 | 1 | 1 | 1 | 1 | 0 | 1 | 1 | 1 | 1 | 1 | 1 | 0 | 1 | 1 | 0 | 0 | 0 | 0 | 0 | 0 | 0 | 0 | 1 | 1 |   |
| <i>Micropsectra</i>                  | 1 | 0 | 0 | 0 | 0 | 0 | 0 | 1 | 0 | 0 | 0 | 0 | 1 | 1 | 1 | 0 | 0 | 1 | 0 | 1 | 1 | 0 | 0 | 1 | 0 | 0 | 1 | 0 | 0 | 1 | 0 |   |
| <i>Chaetocladius</i>                 | 0 | 0 | 0 | 0 | 0 | 0 | 0 | 0 | 0 | 0 | 0 | 0 | 0 | 0 | 1 | 0 | 0 | 0 | 0 | 0 | 0 | 0 | 0 | 0 | 0 | 0 | 0 | 0 | 0 | 0 | 0 |   |
| <i>Corynoneura</i>                   | 0 | 1 | 0 | 1 | 1 | 0 | 0 | 1 | 0 | 1 | 0 | 0 | 1 | 0 | 0 | 0 | 0 | 0 | 0 | 1 | 1 | 1 | 1 | 0 | 0 | 1 | 1 | 1 | 0 | 0 | 0 |   |
| <i>Cardiocladius</i>                 | 0 | 0 | 0 | 0 | 0 | 0 | 0 | 0 | 0 | 1 | 0 | 0 | 0 | 0 | 0 | 0 | 0 | 0 | 0 | 0 | 0 | 0 | 0 | 0 | 0 | 0 | 0 | 0 | 0 | 0 | 0 |   |
| <i>Heterotrissocladius marcidus</i>  | 0 | 1 | 1 | 1 | 1 | 0 | 0 | 0 | 0 | 0 | 1 | 0 | 1 | 1 | 1 | 1 | 0 | 0 | 1 | 0 | 1 | 0 | 0 | 0 | 0 | 0 | 0 | 0 | 0 | 0 | 0 | 0 |
| <i>Cricotopus</i>                    | 0 | 1 | 0 | 0 | 0 | 0 | 0 | 0 | 0 | 1 | 1 | 1 | 0 | 0 | 0 | 0 | 0 | 0 | 0 | 0 | 0 | 0 | 0 | 0 | 0 | 0 | 0 | 1 | 0 | 1 | 0 |   |
| <i>Paracladius alpicola</i>          | 1 | 1 | 0 | 0 | 0 | 0 | 0 | 1 | 1 | 0 | 0 | 1 | 0 | 0 | 0 | 1 | 0 | 0 | 0 | 0 | 0 | 0 | 0 | 0 | 0 | 0 | 0 | 0 | 0 | 0 | 0 | 0 |
| <i>Eukiefferiella</i>                | 0 | 0 | 0 | 0 | 0 | 0 | 0 | 1 | 0 | 0 | 0 | 0 | 0 | 0 | 0 | 0 | 0 | 0 | 0 | 0 | 0 | 0 | 0 | 0 | 0 | 0 | 0 | 0 | 0 | 0 | 0 | 0 |
| <i>Psectrocladius</i>                | 0 | 1 | 0 | 0 | 0 | 0 | 0 | 0 | 0 | 1 | 1 | 0 | 1 | 1 | 1 | 0 | 0 | 0 | 0 | 1 | 1 | 0 | 0 | 0 | 0 | 0 | 0 | 0 | 0 | 0 | 0 | 0 |
| <i>Acamptocladius reissi</i>         | 0 | 0 | 0 | 0 | 0 | 0 | 0 | 0 | 0 | 0 | 0 | 0 | 0 | 0 | 0 | 0 | 0 | 0 | 0 | 0 | 0 | 0 | 0 | 0 | 0 | 1 | 0 | 0 | 0 | 0 | 0 | 0 |
| <i>Camptocladius</i>                 | 0 | 0 | 0 | 0 | 0 | 0 | 0 | 0 | 0 | 0 | 0 | 0 | 1 | 0 | 0 | 0 | 0 | 0 | 0 | 0 | 0 | 0 | 0 | 0 | 0 | 0 | 0 | 0 | 0 | 0 | 0 | 0 |
| <i>Bryophaenocladius subvernalis</i> | 0 | 0 | 0 | 0 | 1 | 0 | 0 | 0 | 0 | 0 | 0 | 0 | 0 | 0 | 1 | 0 | 0 | 0 | 0 | 0 | 0 | 0 | 0 | 0 | 0 | 0 | 0 | 0 | 0 | 0 | 0 | 0 |
| <i>Heleniella</i>                    | 0 | 0 | 0 | 0 | 0 | 0 | 0 | 1 | 0 | 0 | 0 | 0 | 0 | 0 | 0 | 0 | 0 | 0 | 0 | 0 | 0 | 0 | 0 | 0 | 0 | 0 | 0 | 0 | 0 | 0 | 0 | 0 |
| <i>Limnophyes</i>                    | 0 | 1 | 0 | 0 | 1 | 0 | 0 | 0 | 1 | 0 | 0 | 0 | 1 | 1 | 0 | 0 | 1 | 0 | 0 | 1 | 0 | 0 | 1 | 0 | 0 | 0 | 0 | 0 | 0 | 0 | 0 | 0 |
| <i>Paracricotopus</i>                | 0 | 0 | 0 | 0 | 0 | 0 | 0 | 0 | 0 | 0 | 0 | 1 | 0 | 0 | 0 | 0 | 0 | 0 | 0 | 0 | 0 | 0 | 0 | 0 | 0 | 0 | 0 | 0 | 0 | 0 | 0 | 0 |
| <i>Parasmittia</i>                   | 0 | 0 | 0 | 0 | 1 | 0 | 0 | 0 | 0 | 0 | 0 | 0 | 0 | 0 | 0 | 0 | 0 | 0 | 0 | 0 | 0 | 0 | 0 | 0 | 0 | 0 | 0 | 0 | 0 | 0 | 0 | 0 |
| <i>Paratrichocladius</i>             | 0 | 0 | 0 | 0 | 0 | 0 | 0 | 0 | 0 | 0 | 0 | 0 | 0 | 1 | 0 | 0 | 0 | 0 | 0 | 1 | 0 | 0 | 0 | 0 | 0 | 0 | 0 | 0 | 0 | 0 | 0 | 0 |
| <i>Parorthocladius nudipennis</i>    | 0 | 0 | 0 | 0 | 0 | 0 | 0 | 0 | 0 | 0 | 0 | 0 | 0 | 0 | 0 | 1 | 0 | 0 | 0 | 0 | 0 | 0 | 0 | 0 | 0 | 0 | 0 | 0 | 0 | 0 | 0 | 0 |
| <i>Rheocricotopus</i>                | 0 | 0 | 0 | 0 | 0 | 0 | 0 | 0 | 0 | 0 | 0 | 0 | 0 | 0 | 0 | 1 | 0 | 0 | 0 | 0 | 0 | 0 | 0 | 0 | 0 | 0 | 0 | 0 | 0 | 0 | 0 | 0 |
| <i>Smittia</i>                       | 0 | 1 | 0 | 0 | 0 | 0 | 0 | 0 | 0 | 0 | 0 | 0 | 0 | 0 | 0 | 0 | 0 | 0 | 0 | 0 | 0 | 0 | 0 | 0 | 0 | 0 | 0 | 0 | 0 | 0 | 0 | 0 |
| <i>Thienemanniella</i>               | 0 | 1 | 0 | 0 | 0 | 0 | 0 | 0 | 0 | 0 | 0 | 0 | 0 | 0 | 0 | 0 | 0 | 0 | 0 | 0 | 0 | 0 | 0 | 0 | 0 | 0 | 0 | 0 | 0 | 0 | 0 | 0 |
| <i>Tvetenia calvescens</i>           | 0 | 1 | 0 | 0 | 0 | 0 | 0 | 0 | 0 | 0 | 1 | 0 | 0 | 0 | 0 | 1 | 0 | 0 | 0 | 0 | 0 | 0 | 0 | 0 | 0 | 1 | 0 | 1 | 1 | 0 | 0 | 0 |
| <i>Natarsia</i>                      | 0 | 0 | 0 | 0 | 0 | 0 | 0 | 0 | 0 | 0 | 0 | 0 | 0 | 0 | 0 | 0 | 0 | 0 | 0 | 0 | 0 | 0 | 0 | 0 | 0 | 0 | 0 | 1 | 0 | 0 | 0 | 0 |
| <i>Prodiamesa olivacea</i>           | 0 | 1 | 1 | 0 | 0 | 0 | 0 | 0 | 0 | 0 | 1 | 0 | 1 | 1 | 0 | 0 | 0 | 0 | 0 | 0 | 0 | 0 | 0 | 0 | 0 | 0 | 0 | 0 | 0 | 1 | 0 | 1 |
| <i>Diamesa</i>                       | 0 | 0 | 0 | 0 | 0 | 0 | 0 | 0 | 0 | 0 | 0 | 0 | 0 | 0 | 1 | 0 | 0 | 0 | 0 | 0 | 0 | 0 | 0 | 0 | 0 | 0 | 0 | 0 | 0 | 0 | 0 | 0 |
| <i>Protanypus</i>                    | 0 | 0 | 0 | 0 | 0 | 0 | 0 | 0 | 0 | 0 | 0 | 0 | 0 | 0 | 0 | 1 | 0 | 0 | 0 | 0 | 0 | 0 | 0 | 0 | 0 | 0 | 0 | 0 | 0 | 0 | 0 | 0 |
| <i>Pseudodiamesa</i>                 | 1 | 0 | 0 | 0 | 0 | 1 | 1 | 1 | 1 | 0 | 0 | 0 | 0 | 0 | 0 | 0 | 1 | 0 | 0 | 0 | 0 | 0 | 0 | 0 | 0 | 0 | 0 | 0 | 0 | 0 | 0 | 0 |

[illegible]

|                        |   |   |   |   |   |   |   |   |   |   |   |   |   |   |   |   |   |   |   |   |   |   |   |   |   |   |
|------------------------|---|---|---|---|---|---|---|---|---|---|---|---|---|---|---|---|---|---|---|---|---|---|---|---|---|---|
| Polycentropodidae      | 0 | 0 | 0 | 0 | 0 | 0 | 0 | 0 | 0 | 0 | 1 | 0 | 1 | 0 | 0 | 0 | 0 | 0 | 0 | 1 | 0 | 0 | 0 | 0 | 0 | 0 |
| Melampophylax mucoreus | 0 | 0 | 0 | 0 | 1 | 0 | 0 | 0 | 0 | 0 | 0 | 0 | 0 | 0 | 0 | 0 | 0 | 0 | 0 | 0 | 0 | 0 | 0 | 0 | 0 | 0 |
| Sericostoma            | 0 | 0 | 0 | 0 | 0 | 0 | 0 | 0 | 0 | 0 | 0 | 0 | 0 | 0 | 0 | 0 | 0 | 0 | 0 | 0 | 0 | 1 | 0 | 0 | 0 | 0 |
| Odontocerum albicorne  | 0 | 0 | 0 | 0 | 0 | 0 | 0 | 0 | 0 | 0 | 0 | 0 | 1 | 0 | 0 | 0 | 0 | 0 | 0 | 0 | 0 | 0 | 0 | 0 | 0 | 0 |
| Chaetopteryx gessneri  | 0 | 0 | 0 | 0 | 0 | 0 | 0 | 0 | 0 | 0 | 0 | 0 | 0 | 0 | 0 | 0 | 0 | 0 | 0 | 0 | 0 | 0 | 0 | 0 | 0 | 1 |
| Plectrocnemia          | 0 | 0 | 0 | 1 | 0 | 0 | 0 | 0 | 0 | 0 | 1 | 0 | 0 | 0 | 0 | 0 | 0 | 0 | 0 | 1 | 0 | 0 | 0 | 0 | 0 | 0 |
| Rhyacophilidae         | 0 | 0 | 0 | 0 | 0 | 0 | 0 | 0 | 0 | 0 | 0 | 0 | 1 | 0 | 0 | 0 | 0 | 0 | 0 | 0 | 0 | 0 | 0 | 0 | 0 | 0 |
| Rhyacophila italica    | 0 | 0 | 0 | 0 | 0 | 0 | 0 | 0 | 0 | 0 | 0 | 0 | 0 | 1 | 0 | 0 | 0 | 0 | 0 | 0 | 0 | 0 | 0 | 0 | 0 | 0 |
| Caenis horaria         | 0 | 0 | 0 | 0 | 0 | 0 | 0 | 0 | 0 | 0 | 0 | 0 | 0 | 0 | 0 | 0 | 0 | 0 | 0 | 0 | 1 | 1 | 0 | 1 | 0 | 0 |
| Cloeon cognatum        | 0 | 0 | 0 | 0 | 0 | 0 | 0 | 0 | 0 | 0 | 0 | 0 | 0 | 0 | 0 | 0 | 0 | 0 | 0 | 0 | 0 | 0 | 1 | 0 | 0 | 0 |
| Proclleon pennulatum   | 0 | 0 | 0 | 0 | 0 | 0 | 0 | 0 | 0 | 0 | 0 | 0 | 0 | 0 | 0 | 0 | 0 | 0 | 0 | 0 | 0 | 1 | 0 | 0 | 0 | 0 |
| Leuctra                | 0 | 0 | 0 | 0 | 1 | 0 | 0 | 0 | 0 | 0 | 0 | 0 | 0 | 0 | 0 | 0 | 0 | 0 | 0 | 0 | 0 | 0 | 0 | 0 | 0 | 0 |
| Nemouridae             | 0 | 0 | 0 | 0 | 1 | 0 | 0 | 0 | 0 | 0 | 0 | 0 | 1 | 0 | 0 | 0 | 0 | 0 | 0 | 0 | 0 | 0 | 0 | 0 | 0 | 0 |
| Nemoura                | 0 | 0 | 0 | 0 | 0 | 0 | 0 | 0 | 0 | 0 | 0 | 0 | 1 | 0 | 0 | 0 | 0 | 0 | 1 | 1 | 1 | 0 | 0 | 0 | 0 | 0 |
| Nemurella pictetii     | 0 | 0 | 0 | 0 | 1 | 0 | 0 | 0 | 0 | 1 | 0 | 0 | 0 | 1 | 0 | 0 | 0 | 0 | 0 | 0 | 0 | 0 | 0 | 0 | 0 | 0 |
| Elophila nymphaeata    | 0 | 0 | 0 | 0 | 0 | 0 | 0 | 0 | 0 | 0 | 0 | 0 | 0 | 0 | 0 | 0 | 0 | 0 | 0 | 0 | 0 | 0 | 1 | 0 | 0 | 0 |
| Sialis                 | 0 | 0 | 0 | 0 | 0 | 0 | 0 | 0 | 0 | 0 | 0 | 0 | 0 | 0 | 0 | 0 | 0 | 0 | 1 | 0 | 1 | 1 | 0 | 1 | 0 | 0 |
| Orthetrum              | 0 | 0 | 0 | 0 | 0 | 0 | 0 | 0 | 0 | 0 | 0 | 0 | 0 | 0 | 0 | 0 | 0 | 0 | 1 | 0 | 0 | 0 | 0 | 0 | 0 | 0 |
| Sympetrum sanguineum   | 0 | 0 | 0 | 0 | 0 | 0 | 0 | 0 | 0 | 0 | 0 | 0 | 0 | 0 | 0 | 0 | 0 | 0 | 0 | 0 | 0 | 1 | 0 | 0 | 0 | 0 |
| Anax imperator         | 0 | 0 | 0 | 0 | 0 | 0 | 0 | 0 | 0 | 0 | 0 | 0 | 0 | 0 | 0 | 0 | 0 | 0 | 0 | 0 | 0 | 1 | 1 | 0 | 0 | 1 |
| Sympecma fusca         | 0 | 0 | 0 | 0 | 0 | 0 | 0 | 0 | 0 | 0 | 0 | 0 | 0 | 0 | 0 | 0 | 0 | 0 | 0 | 0 | 0 | 1 | 0 | 0 | 0 | 0 |
| Coenagrion puella      | 0 | 0 | 0 | 0 | 0 | 0 | 0 | 0 | 0 | 0 | 0 | 0 | 0 | 0 | 0 | 0 | 0 | 0 | 0 | 0 | 0 | 0 | 1 | 0 | 0 | 0 |
| Libellula depressa     | 0 | 0 | 0 | 0 | 0 | 0 | 0 | 0 | 0 | 0 | 0 | 0 | 0 | 0 | 0 | 0 | 0 | 0 | 0 | 0 | 0 | 1 | 0 | 0 | 0 | 0 |
| Ischnura elegans       | 0 | 0 | 0 | 0 | 0 | 0 | 0 | 0 | 0 | 0 | 0 | 0 | 0 | 0 | 0 | 0 | 0 | 0 | 0 | 1 | 0 | 0 | 0 | 1 | 0 | 0 |
| Aeshna                 | 0 | 0 | 0 | 0 | 0 | 0 | 0 | 0 | 0 | 0 | 0 | 0 | 0 | 0 | 0 | 1 | 0 | 0 | 1 | 0 | 0 | 0 | 0 | 0 | 0 | 0 |
| Sigara                 | 0 | 0 | 0 | 0 | 0 | 0 | 0 | 0 | 0 | 0 | 0 | 0 | 0 | 0 | 0 | 0 | 0 | 0 | 0 | 0 | 0 | 0 | 1 | 0 | 1 | 0 |
| Notonecta              | 0 | 0 | 0 | 0 | 0 | 0 | 0 | 0 | 0 | 0 | 0 | 0 | 0 | 0 | 0 | 0 | 0 | 0 | 0 | 0 | 0 | 0 | 1 | 0 | 0 | 1 |
| Aquarius najas         | 0 | 0 | 0 | 0 | 0 | 0 | 0 | 0 | 0 | 0 | 0 | 0 | 0 | 0 | 0 | 0 | 0 | 0 | 0 | 0 | 0 | 0 | 0 | 0 | 0 | 1 |
| Velia muelleri         | 0 | 0 | 0 | 0 | 0 | 0 | 0 | 0 | 0 | 0 | 0 | 0 | 0 | 0 | 0 | 0 | 0 | 0 | 0 | 0 | 0 | 0 | 0 | 0 | 0 | 1 |
| Gerris asper           | 0 | 0 | 0 | 0 | 0 | 0 | 0 | 0 | 0 | 0 | 0 | 0 | 0 | 0 | 0 | 0 | 0 | 0 | 0 | 0 | 0 | 0 | 1 | 0 | 0 | 0 |
| Limnodrilus            | 0 | 0 | 0 | 0 | 0 | 0 | 0 | 0 | 0 | 0 | 0 | 0 | 0 | 0 | 0 | 0 | 0 | 0 | 0 | 1 | 1 | 0 | 0 | 0 | 0 | 0 |
| Tubificidae            | 1 | 1 | 1 | 0 | 1 | 0 | 0 | 0 | 0 | 0 | 0 | 0 | 1 | 0 | 0 | 0 | 0 | 1 | 1 | 0 | 0 | 0 | 0 | 0 | 0 | 1 |
| Tubifex tubifex        | 0 | 0 | 0 | 0 | 0 | 0 | 0 | 0 | 0 | 0 | 0 | 0 | 0 | 0 | 0 | 0 | 0 | 0 | 0 | 0 | 0 | 1 | 0 | 0 | 0 | 0 |

[illegible]



|                           |   |   |   |   |   |   |   |   |   |   |   |   |   |   |   |   |   |   |   |   |   |   |   |   |   |   |   |
|---------------------------|---|---|---|---|---|---|---|---|---|---|---|---|---|---|---|---|---|---|---|---|---|---|---|---|---|---|---|
| <i>Lebertia dubia</i>     | 0 | 0 | 0 | 1 | 0 | 0 | 0 | 0 | 0 | 0 | 0 | 0 | 0 | 0 | 0 | 0 | 0 | 0 | 0 | 0 | 0 | 0 | 0 | 0 | 0 | 0 | 0 |
| <i>Sperchon squamosus</i> | 0 | 0 | 0 | 1 | 0 | 0 | 0 | 0 | 0 | 0 | 0 | 0 | 0 | 0 | 0 | 0 | 0 | 0 | 0 | 0 | 0 | 0 | 0 | 0 | 0 | 0 | 0 |
| <i>Ceratopogonidae</i>    | 0 | 0 | 0 | 1 | 0 | 0 | 0 | 0 | 0 | 0 | 0 | 0 | 0 | 0 | 0 | 0 | 0 | 0 | 0 | 0 | 0 | 0 | 0 | 0 | 0 | 0 | 0 |

**Table S3.** IndVal analysis for Alpine and Apennines sites. A: probability that the surveyed site belongs to the target site group given the fact that the taxon has been found; B: probability of finding the taxon in sites belonging to the site group. All the reported associations were not significant after 999 permutations at  $\alpha = 0.05$  and the Holm correction for multiple comparisons.

| <b>Alps</b>      |                                     |      |      |        |
|------------------|-------------------------------------|------|------|--------|
| Taxonomic rank   | Taxa                                | A    | B    | IndVal |
| Chironomidae     | <i>Zavreliomyia</i>                 | 1.00 | 0.62 | 0.79   |
| Chironomidae     | <i>Heterotrissocladius marcidus</i> | 1.00 | 0.52 | 0.72   |
| <b>Apennines</b> |                                     |      |      |        |
| Hirudinea        | <i>Helobdella stagnalis</i>         | 1.00 | 0.67 | 0.82   |
| Oligochaeta      | <i>Homochaeta</i> spp.              | 1.00 | 0.67 | 0.82   |
| Chironomidae     | <i>Cladotanytarsus</i> spp.         | 0.93 | 0.67 | 0.79   |
| Trichoptera      | <i>Limnephilus</i> spp.             | 0.93 | 0.67 | 0.79   |
| Hirudinea        | <i>Herpobdella testacea</i>         | 0.93 | 0.67 | 0.79   |
| Chironomidae     | <i>Tanytarsus</i> spp.              | 0.71 | 0.83 | 0.77   |
| Odonata          | <i>Anax imperator</i>               | 1.00 | 0.50 | 0.71   |
| Ephemeroptera    | <i>Caenis horaria</i>               | 1.00 | 0.50 | 0.71   |
| Chironomidae     | <i>Cladopelma</i> spp.              | 1.00 | 0.50 | 0.71   |
| Coleoptera       | <i>Haliphus</i> spp.                | 1.00 | 0.50 | 0.71   |
| Oligochaeta      | <i>Pristina bilobata</i>            | 1.00 | 0.50 | 0.71   |
| Gastropoda       | <i>Radix labiata</i>                | 1.00 | 0.50 | 0.71   |
| Bivalvia         | <i>Sphaerium corneum</i>            | 1.00 | 0.50 | 0.71   |
